# Supplementary material for: Chemogenomic Landscape of RUNX1 -mutated AML Reveals Importance of RUNX1 Allele Dosage in Genetics and Glucocorticoid Sensitivity
Source: Oxford University Press journal article supplement (doi:10.1158/1078-0432.ccr-17-1259), 2017-08-30
Supplement: 10780432ccr171259-sup-182732_3_supp_4207773_33hgg3.xlsx [file 10780432ccr171259-sup-182732_3_supp_4207773_33hgg3.xlsx]

## Sheet: SupTable1
Supplementary Table 1
List of 97 gene mutations and fusions systematically included in mutational analysis.
Type	Gene
Mutation	APC
Mutation	ARID1A
Mutation	ASXL1
Mutation	ASXL2
Mutation	ATRX
Mutation	BCOR
Mutation	BCORL1
Mutation	BIRC3
Mutation	BRAF
Mutation	CALR
Fusion gene	CBFB-MYH11
Mutation	CBL
Mutation	CBLB
Mutation	CBLC
Mutation	CDKN2A
Mutation	CEBPA
Mutation	CEBPB
Mutation	CEBPD
Mutation	CEBPE
Mutation	CEBPG
Mutation	CEBPZ
Mutation	CREBBP
Mutation	CSF3R
Mutation	CTNNA1
Mutation	CUX1
Mutation	DDX41
Mutation	DNMT3A
Mutation	EED
Mutation	EP300
Mutation	ETV6
Fusion gene	EVI1 (several rearrangements)
Mutation	EZH2
Mutation	FBXW7
Mutation	FLT3
Mutation	GATA1
Mutation	GATA2
Mutation	GNAS
Mutation	H3F3A
Mutation	HIST1H3F
Mutation	HIST1H3H
Mutation	HRAS
Mutation	IDH1
Mutation	IDH2
Mutation	IKZF1
Mutation	IRF1
Mutation	JAK1
Mutation	JAK2
Mutation	JAK3
Mutation	KDM6A
Mutation	KIT
Mutation	KMT2A
Mutation	KMT2B
Mutation	KMT2C
Mutation	KMT2D
Mutation	KRAS
Fusion gene	MLL (several rearrangements)
Fusion gene	ML-RARA
Mutation	MPL
Mutation	MYC
Mutation	MYD88
Mutation	NF1
Mutation	NOTCH1
Mutation	NPM1
Mutation	NRAS
Fusion gene	NUP98-NSD1
Mutation	PHF6
Mutation	PTEN
Mutation	PTPN11
Mutation	RAD21
Mutation	RHOA
Mutation	RUNX1
Fusion gene	RUNX1-RUNX1T1
Mutation	SETBP1
Mutation	SETD2
Mutation	SF3B1
Mutation	SH2B3
Mutation	SMARCA4
Mutation	SMC1A
Mutation	SMC3
Mutation	SMC5
Mutation	SPI1
Mutation	SRSF2
Mutation	STAG1
Mutation	STAG2
Mutation	STAT3
Mutation	STAT5A
Mutation	STAT5B
Mutation	SUZ12
Mutation	TET2
Mutation	TP53
Mutation	U2AF1
Mutation	USP7
Mutation	WHSC1
Mutation	WT1
Mutation	ZBTB7A
Mutation	ZMYM3
Mutation	ZRSR2
