# Supplementary material for: Chemogenomic Landscape of RUNX1 -mutated AML Reveals Importance of RUNX1 Allele Dosage in Genetics and Glucocorticoid Sensitivity
Source: Oxford University Press journal article supplement (doi:10.1158/1078-0432.ccr-17-1259), 2017-08-30
Supplement: 10780432ccr171259-sup-182732_3_supp_4207776_55hgg5.xlsx [file 10780432ccr171259-sup-182732_3_supp_4207776_55hgg5.xlsx]

## Sheet: Sheet1
Supplementary Table 4
List of 100 genes most differentially expressed genes in RUNX1mut AML (n=47) compared to RUNX1wt AML (n=368).
GENE	q.value	Difference (average log10)	RUNX1 mut (average log10)	RUNX1wt(average log10)	Mean RUNX1mut (RPKM)	Median RUNX1mut (RPKM)	Mean RUNX1 wt (RPKM)	Median RUNX1 wt (RPKM)
EGFEM1P	4.98069e-09	-1.56107	3.30926	1.74819	1.13005	0.30385	0.245014	0.00666
DNTT	1.93271e-05	-1.28628	4.81574	3.52946	81.4798	22.2214	11.4206	0.37246
HMGA2	1.18112e-05	-1.26169	3.33164	2.06994	1.9627	0.44187	0.502198	0.01031
SNORD116-13	3.1452e-05	-1.13104	3.20401	2.07297	0.339352	0.26968	0.162328	0.074865
DLK1	0.000694791	-1.1194	3.67008	2.55068	18.0856	0.56274	5.86888	0.04363
CHRDL1	3.70282e-05	-1.11658	3.71225	2.59567	4.48405	0.95181	1.03777	0.05147
BAALCOS	2.28909e-06	-1.1162	3.75071	2.63451	1.2608	0.83791	0.567281	0.100665
SLC24A5	9.88105e-07	-1.08921	3.27994	2.19073	0.41181	0.30717	0.162246	0.02423
BAALC	1.83506e-08	-1.08144	5.55313	4.47169	78.725	56.25	19.0897	3.39536
FAM171B	2.93739e-09	-1.015	3.98019	2.96519	1.77145	1.21568	0.498971	0.10382
GPR173	1.22972e-05	-1.00849	3.53291	2.52443	1.07554	0.98304	0.383875	0.03296
SNORD116-21	1.78436e-05	-1.00743	3.92457	2.91714	1.3671	1.14277	0.70696	0.40923
FAM171A1	1.40321e-05	-0.994928	4.14809	3.15316	9.41221	3.35251	2.1225	0.0788
SNORD116-14	0.00051938	-0.986501	3.14369	2.15719	0.291483	0.20138	0.165207	0.08851
MIR451A	0.00323626	-0.972234	3.22349	2.25126	1.52576	0.42656	1.42124	0.08778
DSG2	0.000279537	-0.965981	3.64868	2.6827	3.92985	0.91372	1.05631	0.037155
SDK2	1.27303e-07	-0.950688	4.08865	3.13796	4.30651	1.92868	0.689758	0.10339
MYCT1	0.000109857	-0.947713	3.61354	2.66583	3.93812	0.36881	1.16971	0.04477
SNORD116-22	0.000195611	-0.944574	3.1157	2.17112	0.396751	0.32559	0.1973	0.096025
XXYLT1-AS2	1.33148e-07	-0.941184	3.90525	2.96406	2.41436	0.57266	0.553726	0.10249
HTR1F	8.01087e-06	-0.928621	4.37388	3.44526	5.13645	3.66215	2.04345	0.579185
MIR6871	3.50204e-05	-0.928136	3.38267	2.45453	0.734305	0.36298	0.2238	0.11826
SNORD116-24	5.77086e-05	-0.927537	3.76486	2.83732	1.09352	0.85746	0.559753	0.343565
DEFA8P	0.00248794	-0.916686	3.99284	3.07615	9.76114	1.1526	5.44691	0.21901
CLEC9A	4.82225e-06	-0.907883	3.89712	2.98924	4.05571	1.22915	1.00848	0.085685
DUSP27	0.000115743	-0.900293	3.54524	2.64495	1.16105	0.53671	0.604679	0.069845
KIRREL	1.43237e-05	-0.885899	3.49556	2.60966	1.22758	0.82249	0.411016	0.0671
NPR3	5.61146e-08	-0.870192	5.32805	4.45786	36.7513	31.2785	12.1287	5.73683
CALN1	3.22993e-06	-0.8671	4.02886	3.16176	3.36204	2.06319	0.923528	0.139935
PROM1	5.25554e-06	-0.861684	5.25466	4.39297	33.3181	29.5286	15.1614	6.32274
TSPAN7	7.97271e-06	-0.858535	4.54464	3.6861	11.4631	4.80956	3.70462	0.48209
LRP6	3.74748e-07	-0.854154	4.06448	3.21032	2.85823	2.72927	0.881908	0.088485
L3MBTL4	5.2323e-07	-0.84797	3.96279	3.11482	2.61018	2.40678	0.686771	0.101105
SNORD116-20	1.08413e-05	-0.841011	3.70986	2.86885	1.12051	0.93428	0.54506	0.30971
LOC101929633	0.000138285	-0.839965	3.14804	2.30808	0.591935	0.15268	0.336589	0.041675
APP	3.82239e-07	-0.839333	5.78071	4.94138	78.0929	73.8332	35.9557	13.7995
CD34	3.05421e-05	-0.834659	5.90285	5.06819	168.292	149.94	80.4554	27.6832
CRISP3	0.000203672	-0.829436	4.32223	3.4928	12.2042	2.94361	8.69447	0.327005
BEND4	1.4896e-05	-0.82762	3.88859	3.06097	2.64497	1.55542	1.09712	0.048905
CYYR1	0.00409613	-0.82396	3.20265	2.37869	2.00725	0.12941	0.806835	0.023645
CRHBP	1.35328e-07	-0.817894	4.81196	3.99407	42.6133	2.94032	2.6559	1.16599
MYEF2	2.40526e-06	-0.801899	4.23235	3.43046	3.28241	2.55563	1.36173	0.198425
SNORD116-4	9.90403e-06	-0.791051	4.25104	3.45999	2.68097	2.52418	1.42155	1.00859
FGD5	0.000409794	-0.784633	3.54901	2.76437	2.85507	0.2865	0.900941	0.03725
PLSCR4	0.000219648	-0.779061	3.47177	2.69271	1.2128	0.65959	0.531634	0.056695
RBPMS-AS1	0.00319751	-0.777766	3.06834	2.29058	0.503546	0.32055	0.27831	0.090725
LOC100499183	1.35328e-07	-0.775808	3.37342	2.59762	0.456437	0.31659	0.146239	0.062115
SHD	0.000825189	-0.770924	3.62025	2.84933	2.36127	0.42746	1.55047	0.047705
LDOC1	8.57927e-07	-0.767435	3.93635	3.16891	2.61223	0.94733	0.633138	0.122365
PEAR1	3.68552e-07	-0.763703	4.45768	3.69398	6.07214	5.00849	1.99486	0.430445
SLCO5A1	3.02885e-05	-0.759448	3.91571	3.15626	2.79457	1.69089	0.851889	0.121275
MIR6730	0.00158211	-0.753252	3.09866	2.34541	0.517443	0.24313	0.219383	0.083895
S100A16	0.00906543	-0.750976	3.9382	3.18723	16.4384	1.14324	6.34566	0.22276
ABO	4.17746e-05	-0.745988	4.46335	3.71737	8.60984	6.8189	3.66116	0.655325
PXDN	0.00683629	-0.74582	4.05876	3.31294	6.90632	3.18662	6.30177	0.111025
PAWR	0.000174978	-0.739039	4.0447	3.30566	3.67366	2.37949	1.62982	0.0969
MIR503HG	0.00774612	-0.737811	3.55894	2.82113	1.32857	0.99788	0.969321	0.11012
SETBP1	1.83506e-08	-0.734866	4.14531	3.41045	3.12762	1.62437	0.72808	0.20295
MIR4772	0.00292864	-0.731667	3.29214	2.56047	0.867512	0.36281	0.527398	0.125115
SMAD1-AS2	3.83973e-07	-0.725888	3.11167	2.38578	0.197935	0.12233	0.0690059	0.045835
GGTA1P	1.37011e-05	-0.725551	4.61999	3.89444	8.78131	4.46976	3.74376	0.85021
HIST1H2BI	0.014394	-0.723319	3.38276	2.65944	0.504841	0.2191	0.340229	0.12234
PTK2	8.67684e-07	-0.723301	4.57209	3.84879	7.21283	6.62536	2.51756	0.77234
LOC100133669	2.2801e-05	-0.721768	3.29689	2.57513	0.485575	0.3391	0.153971	0.06735
GNG11	9.39993e-05	-0.720244	4.54237	3.82213	11.7625	5.05916	4.60014	0.648475
TRH	0.00150722	-0.707834	4.70151	3.99368	28.8951	7.8509	21.8245	0.573595
LTF	0.000592025	-0.69586	5.60958	4.91372	232.789	43.0444	119.649	8.14555
OLFM4	0.00139141	-0.687708	4.14933	3.46163	16.3893	1.72379	6.65224	0.34154
SPRED1	9.35559e-06	-0.684881	3.72497	3.04009	1.00153	0.79181	0.436694	0.106745
SCN3A	0.00051938	-0.678787	3.00148	2.32269	0.93078	0.05748	0.398922	0.018185
LINC00865	0.000220633	-0.673971	3.9848	3.31083	3.07094	1.10864	1.96816	0.222555
CCDC8	0.00766598	-0.672434	3.10959	2.43716	1.01098	0.38367	0.468319	0.04053
MEG3	0.00671242	-0.670213	3.21408	2.54386	1.63986	0.09113	2.00433	0.020435
CDC42BPA	0.000327607	-0.666392	3.63587	2.96948	1.47116	0.67593	0.895959	0.059215
IL15	1.09415e-08	-0.665229	3.89223	3.227	1.19429	1.03869	0.37812	0.1747
MLLT3	1.83506e-08	-0.66522	4.60324	3.93802	5.85239	3.92381	2.27241	1.0421
F2RL1	5.04336e-06	-0.664357	4.32882	3.66446	4.07425	3.04394	1.5756	0.58031
MYL9	0.000161915	0.66202	3.48075	4.14277	1.98549	0.42038	5.24072	1.36782
BEND6	0.00187018	0.662306	2.57474	3.23704	0.2742	0.05716	0.929213	0.314015
PTGFRN	1.70787e-05	0.672178	2.81614	3.48832	0.226988	0.06433	0.929299	0.375115
PPP1R27	5.20531e-06	0.674471	3.58764	4.26211	0.868372	0.51441	21.1354	1.49559
SEC16B	1.52672e-05	0.676044	3.29347	3.96951	0.691166	0.56744	1.58829	1.33574
AOC1	0.000527985	0.678929	2.97242	3.65135	0.527095	0.15896	1.47945	0.55729
ZNF503-AS2	1.30242e-05	0.679996	2.33508	3.01508	0.0750647	0.04023	0.189538	0.12857
ZNF804A	2.4711e-06	0.683297	3.46209	4.14539	0.914446	0.26833	2.33087	1.82634
TBX1	1.33148e-07	0.685553	2.47102	3.15657	0.0895479	0.02565	0.379683	0.159175
C1orf53	9.20979e-09	0.68641	3.01092	3.69733	0.243659	0.17479	0.794642	0.604455
MARC2	0.000417098	0.71605	3.06524	3.7813	0.819136	0.13816	2.47394	1.1138
TWIST1	1.40321e-05	0.722294	2.34808	3.07037	0.193497	0.01978	1.25095	0.11259
BIK	2.06662e-09	0.726683	3.81265	4.53933	1.11329	0.70538	6.94042	4.36052
LOC200772	0.00263646	0.732885	2.73713	3.47001	0.996816	0.05847	3.94654	0.313235
ADRB1	7.73465e-05	0.738794	2.89939	3.63818	0.343205	0.08675	1.65533	0.65403
KCNE1L	0.000758947	0.773122	2.85636	3.62948	0.204644	0.06496	15.8291	0.129375
NKX2-3	0.0415179	0.793983	2.31026	3.10425	1.58171	0.01333	4.11846	1.10662
DAPL1	0.00339973	0.811027	2.38968	3.20071	0.281084	0.1156	1.97626	0.36093
IRX3	0.000561062	0.817075	2.68628	3.50336	0.933177	0.03994	3.87699	0.42114
ARTN	2.06662e-09	0.829597	3.48238	4.31197	0.622287	0.27591	5.27631	2.40275
LPPR3	6.18359e-08	0.849141	4.0974	4.94654	4.49162	1.57101	18.5845	12.549
PCAT18	8.95148e-06	0.876111	3.02138	3.89749	0.863523	0.07835	3.89617	1.43629
GTSF1	6.94698e-05	0.972902	3.76871	4.74162	8.18989	0.28114	27.3867	21.0156
