# Supplementary material for: Chemogenomic Landscape of RUNX1 -mutated AML Reveals Importance of RUNX1 Allele Dosage in Genetics and Glucocorticoid Sensitivity
Source: Oxford University Press journal article supplement (doi:10.1158/1078-0432.ccr-17-1259), 2017-08-30
Supplement: 10780432ccr171259-sup-182732_3_supp_4207777_99hgg9.xlsx [file 10780432ccr171259-sup-182732_3_supp_4207777_99hgg9.xlsx]

## Sheet: Sheet1
Supplementary Table 5
Genes and positions investigated using km approach.
Gene	Location
ASXL1	exon 12
BRAF	exon 15
CALR	whole transcript
CSF3R	exons 13-15
DNMT3A	exon 23
FLT3	exons 13-15
FLT3	exon 20
GATA2	exons 2-6
IDH1	exons 3-5
IDH2	exons 3-5
JAK2	exons 13-15
KIT	exons 17-18
KIT	exons 7-9
KMT2A	exons 8+2
KRAS	exons 2-3
NPM1	exons 10-11
NRAS	exons-2-3
PTPN11	exon 3
SF3B1	exons 12-16
SRSF2	whole transcript
TP53	whole transcript
WT1	exons 5-6
